# Supplementary material for: Self-assembled branched polypeptides as amelogenin mimics for enamel repair
Source: Royal Society of Chemistry journal article supplement (doi:10.1039/d3tb02709k), 2024-01-01
Supplement: d3tb02709k1.pdf [file d3tb02709k1.pdf]

## Supporting Information

### Self-assembled Branched Polypeptides as Amelogenin Mimics for Enamel Repair

Yue Li,<sup>‡<sup>a</sup></sup> Rong Chang,<sup>‡<sup>a</sup></sup> Yang-Jia Liu,<sup>b</sup> Feng Chen<sup>\*<sup>b</sup></sup> and Yong-Xiang Chen<sup>\*<sup>a</sup></sup>

---

<sup>a</sup>Key Laboratory of Bioorganic Phosphorus Chemistry and Chemical Biology (Ministry of Education), Department of Chemistry, Tsinghua University, Beijing 100084, China. E-mail: chen-yx@mail.tsinghua.edu.cn.

<sup>b</sup>Central Laboratory Peking University Hospital of Stomatology, Beijing 100081, China. E-mail: chenfeng2011@hsc.pku.edu.cn.

**a**

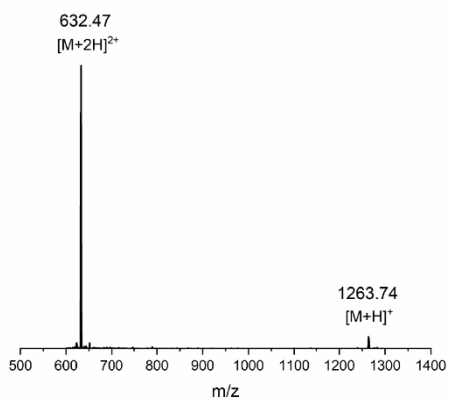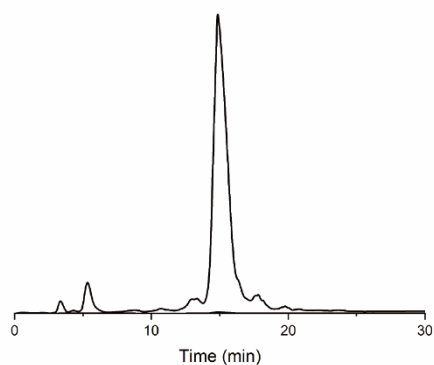

**b**

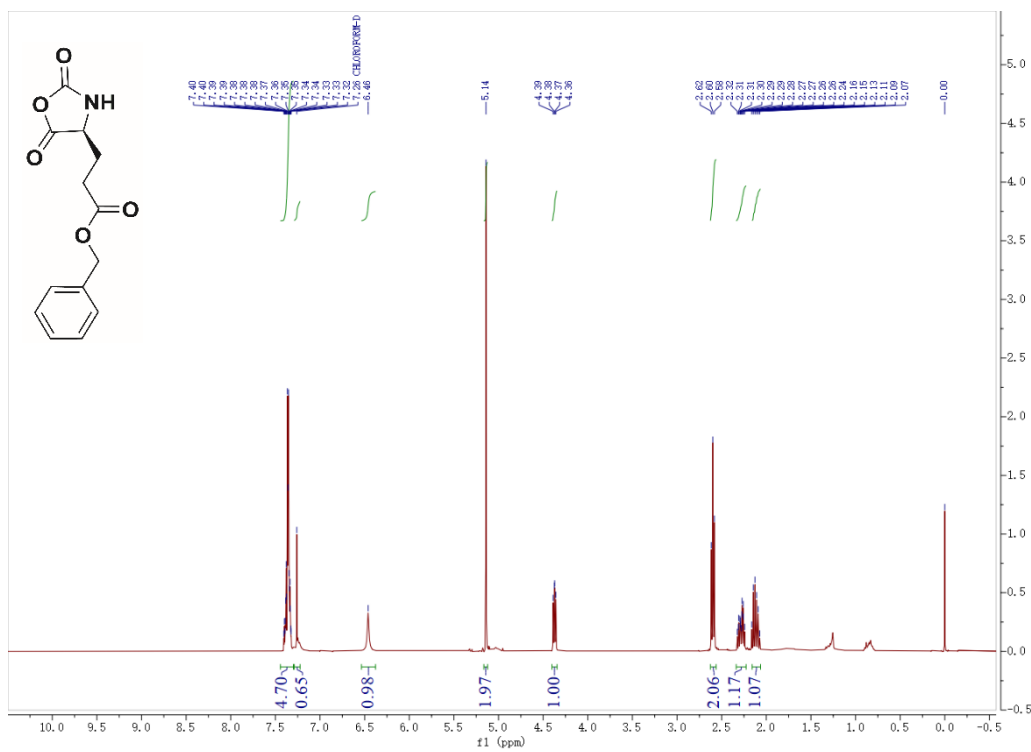

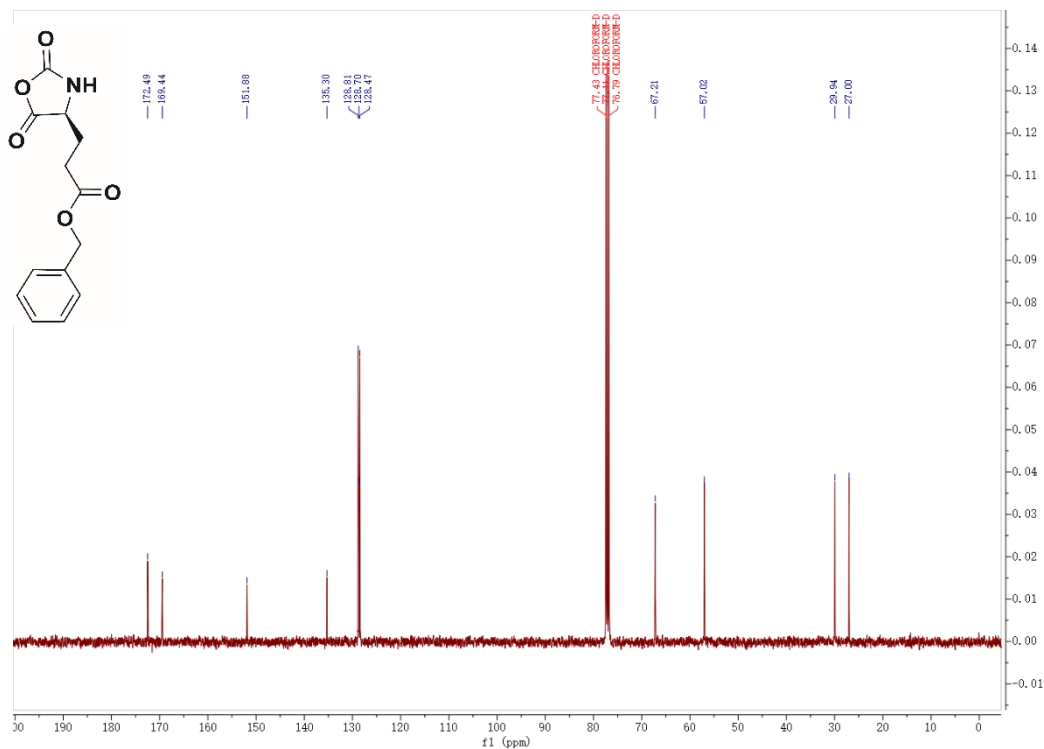

**Fig. S1** a) Electrospray ionization mass spectrometry (ESI-MS) and high-performance liquid chromatography (HPLC) analysis of C-Ame Peptide. Retention time is about 14.87 min in a linear gradient of 5-45% B for 35 min (HPLC solvent A: water, 0.06% TFA; B: 80% CH<sub>3</sub>CN/water, 0.06% TFA). b) <sup>1</sup>H NMR and <sup>13</sup>C NMR spectra of BLG-NCA monomer in CDCl<sub>3</sub>.

**a**

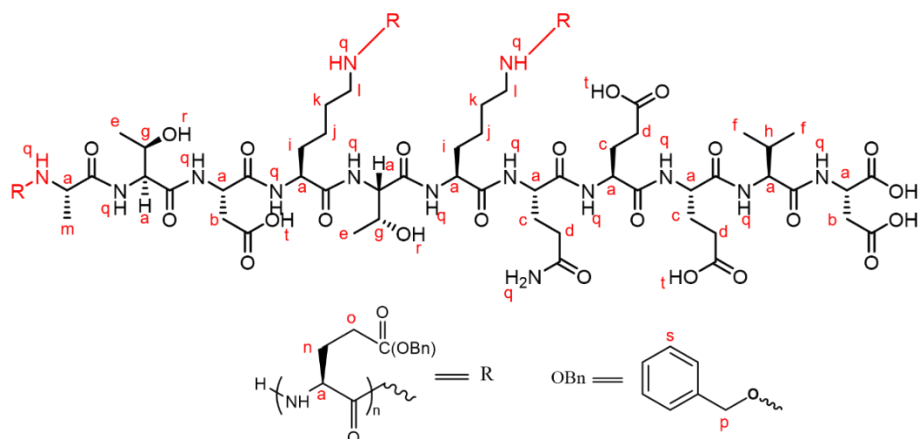

**b**

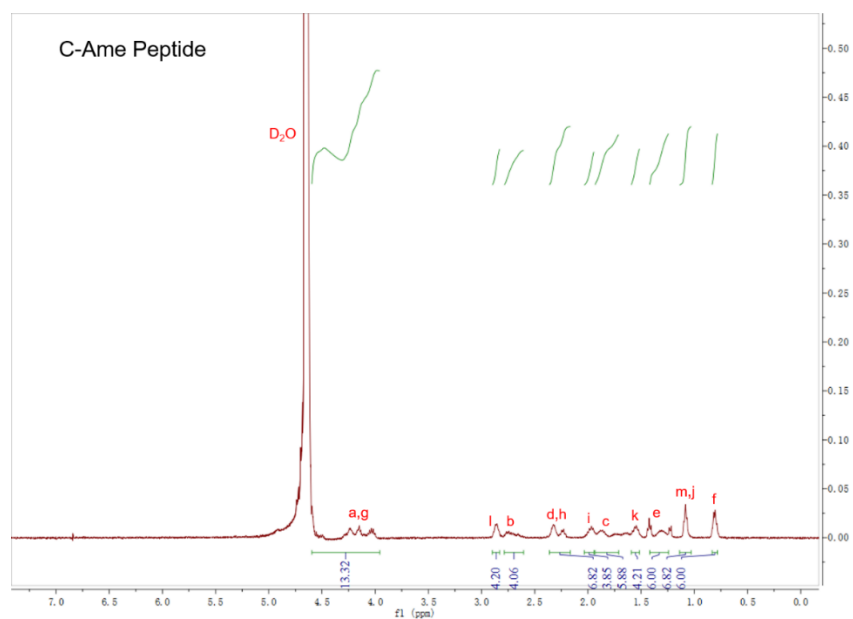

|                | a    | b    | c    | d    | e    | f    | g    | h    | i    | j    | k    | l    | m    |
|----------------|------|------|------|------|------|------|------|------|------|------|------|------|------|
| Chemical Shift | 4.25 | 2.75 | 1.87 | 2.32 | 1.46 | 0.85 | 4.17 | 2.25 | 1.99 | 1.09 | 1.58 | 2.82 | 1.11 |
| Integration    | 11   | 4    | 6    | 6    | 6    | 6    | 2    | 1    | 4    | 4    | 4    | 4    | 3    |

Chemical Formula:  $C_{51}H_{86}N_{14}O_{23}$

Exact Mass: 1262.60

Molecular Weight: 1263.32

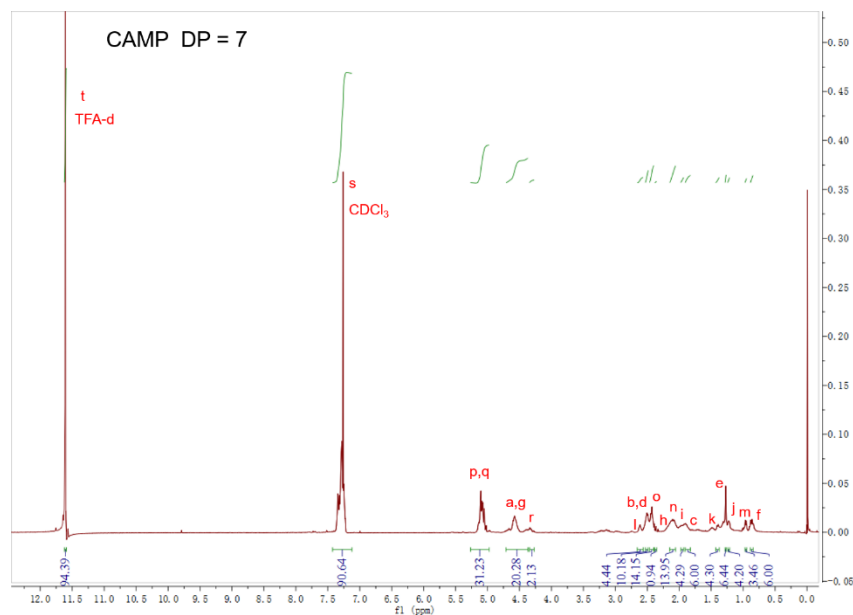

|                | a    | b    | c    | d    | e    | f    | g    | h    | i    | j    | k    | l    | m    | n    | o    | r    |
|----------------|------|------|------|------|------|------|------|------|------|------|------|------|------|------|------|------|
| Chemical Shift | 4.62 | 2.54 | 1.85 | 2.54 | 1.26 | 0.85 | 4.62 | 2.39 | 2.01 | 1.25 | 1.47 | 2.63 | 0.95 | 2.18 | 2.48 | 4.28 |
| Integration    | 18   | 4    | 6    | 6    | 6    | 6    | 2    | 1    | 4    | 4    | 4    | 4    | 3    | 14   | 14   | 2    |

$$\text{Molecular Weight: } 1263.32 + (18-11) \times (237.25-18.02) = 2797.93$$

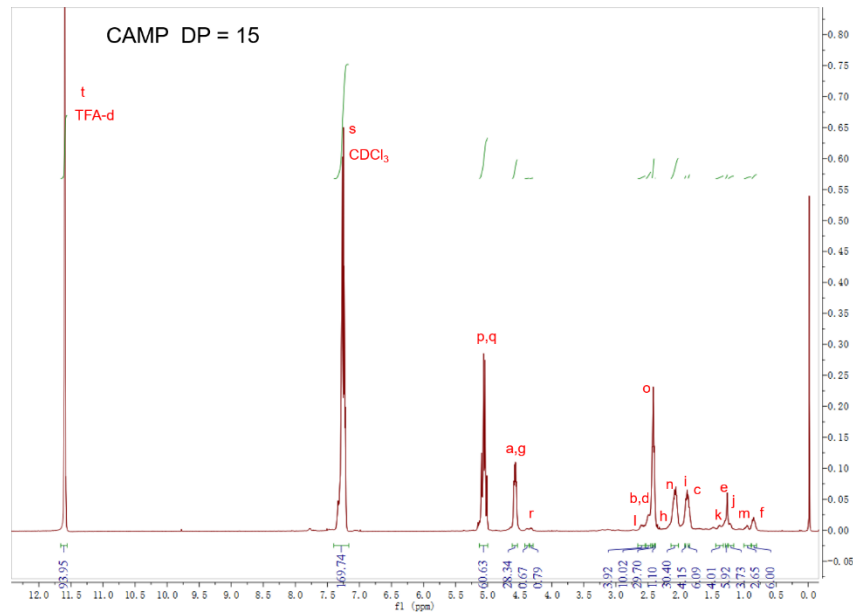

|                | a    | b    | c    | d    | e    | f    | g    | h    | i    | j    | k    | l    | m    | n    | o    | r    |
|----------------|------|------|------|------|------|------|------|------|------|------|------|------|------|------|------|------|
| Chemical Shift | 4.62 | 2.54 | 1.85 | 2.54 | 1.26 | 0.85 | 4.62 | 2.39 | 2.01 | 1.25 | 1.47 | 2.63 | 0.95 | 2.18 | 2.48 | 4.28 |
| Integration    | 26   | 4    | 6    | 6    | 6    | 6    | 2    | 1    | 4    | 4    | 4    | 4    | 3    | 30   | 30   | 2    |

$$\text{Molecular Weight: } 1263.32 + (26-11) \times (237.25-18.02) = 4551.77$$

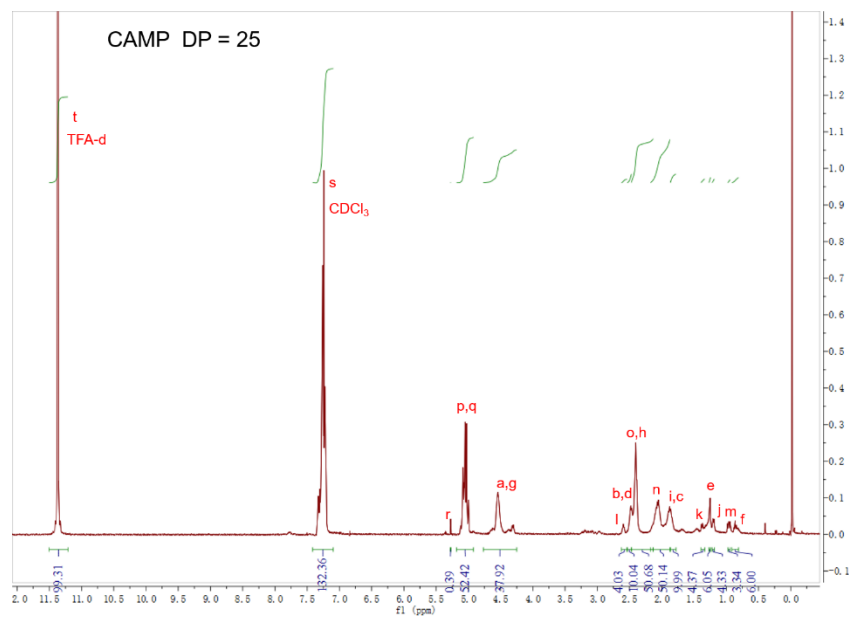

|                | a    | b    | c    | d    | e    | f    | g    | h    | i    | j    | k    | l    | m    | n    | o    | r    |
|----------------|------|------|------|------|------|------|------|------|------|------|------|------|------|------|------|------|
| Chemical Shift | 4.62 | 2.54 | 1.85 | 2.54 | 1.26 | 0.85 | 4.62 | 2.39 | 2.01 | 1.25 | 1.47 | 2.63 | 0.95 | 2.18 | 2.48 | 4.28 |
| Integration    | 36   | 4    | 6    | 6    | 6    | 6    | 2    | 1    | 4    | 4    | 4    | 4    | 3    | 50   | 50   | 2    |

$$\text{Molecular Weight: } 1263.32 + (36-11) \times (237.25-18.02) = 6744.07$$

**c**

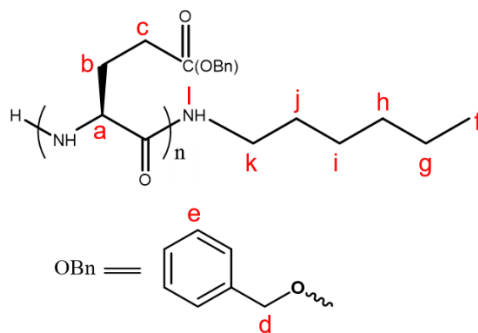

**d**

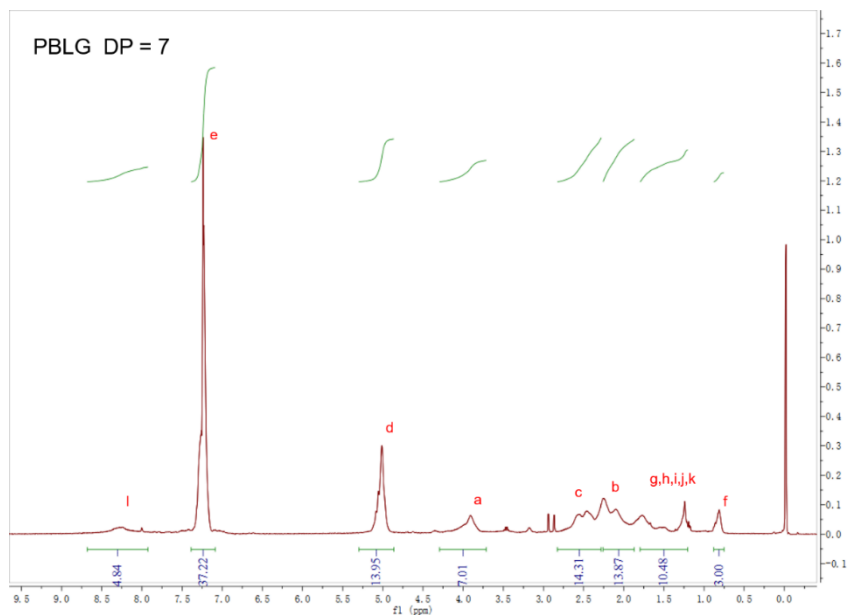

|                | a    | b    | c    | d    | f    | g         | h | i | j | k | l    |
|----------------|------|------|------|------|------|-----------|---|---|---|---|------|
| Chemical Shift | 3.96 | 2.25 | 2.52 | 5.02 | 0.85 | 1.25-1.78 |   |   |   |   | 8.25 |
| Integration    | 7    | 14   | 14   | 14   | 3    | 10        |   |   |   |   | 5    |

Molecular Weight:  $101.19+7 \times (237.25-18.02) = 1635.8$

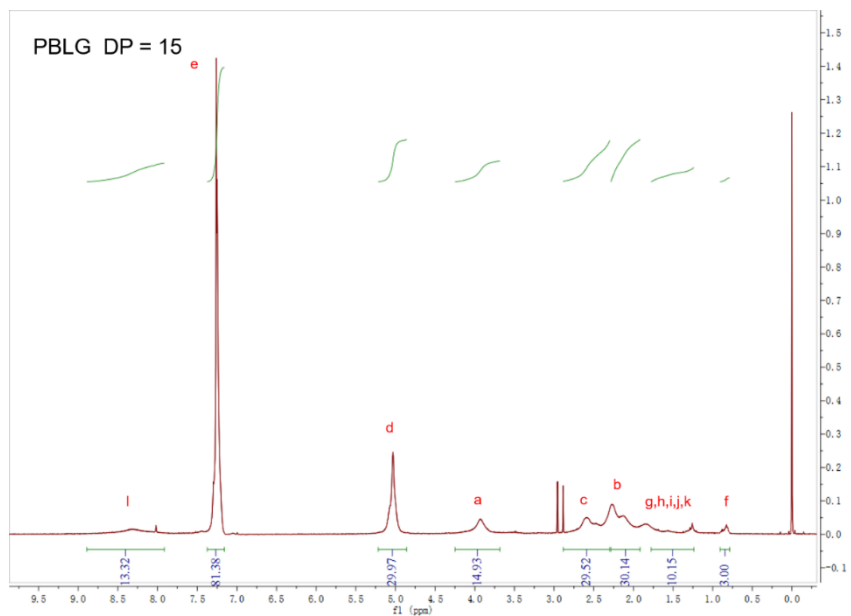

|                | a    | b    | c    | d    | f    | g         | h | i | j | k | l    |
|----------------|------|------|------|------|------|-----------|---|---|---|---|------|
| Chemical Shift | 3.96 | 2.25 | 2.52 | 5.02 | 0.85 | 1.25-1.78 |   |   |   |   | 8.25 |
| Integration    | 15   | 30   | 30   | 30   | 3    | 10        |   |   |   |   | 13   |

Molecular Weight:  $101.19+15 \times (237.25-18.02) = 3389.64$

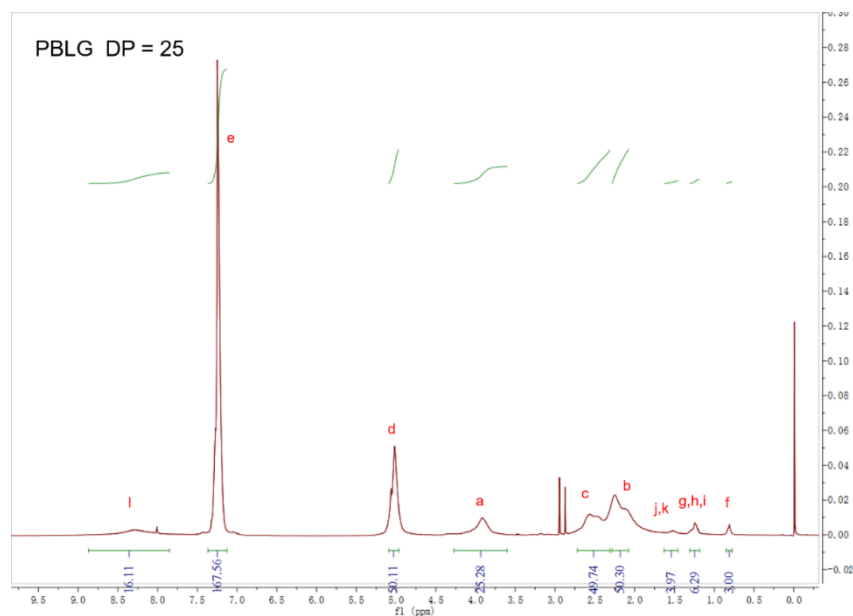

|                | a    | b    | c    | d    | f    | g         | h | i | j | k | l    |
|----------------|------|------|------|------|------|-----------|---|---|---|---|------|
| Chemical Shift | 3.96 | 2.25 | 2.52 | 5.02 | 0.85 | 1.25-1.78 |   |   |   |   | 8.25 |
| Integration    | 25   | 50   | 50   | 50   | 3    | 10        |   |   |   |   | 16   |

Molecular Weight:  $101.19 + 25 \times (237.25 - 18.02) = 5581.94$

**Fig. S2** a) The structure of C-Ame Peptide and CAMPs. b)  $^1\text{H}$  NMR spectra of C-Ame Peptide in  $\text{D}_2\text{O}$ ,  $\text{CAMP}_7$ ,  $\text{CAMP}_{15}$  and  $\text{CAMP}_{25}$  in  $\text{CDCl}_3$  (15% TFA-d). c) The structure of hexylamine and PBLGs. d)  $^1\text{H}$  NMR spectra of  $\text{PBLG}_7$ ,  $\text{PBLG}_{15}$ ,  $\text{PBLG}_{25}$  in  $\text{CDCl}_3$ .



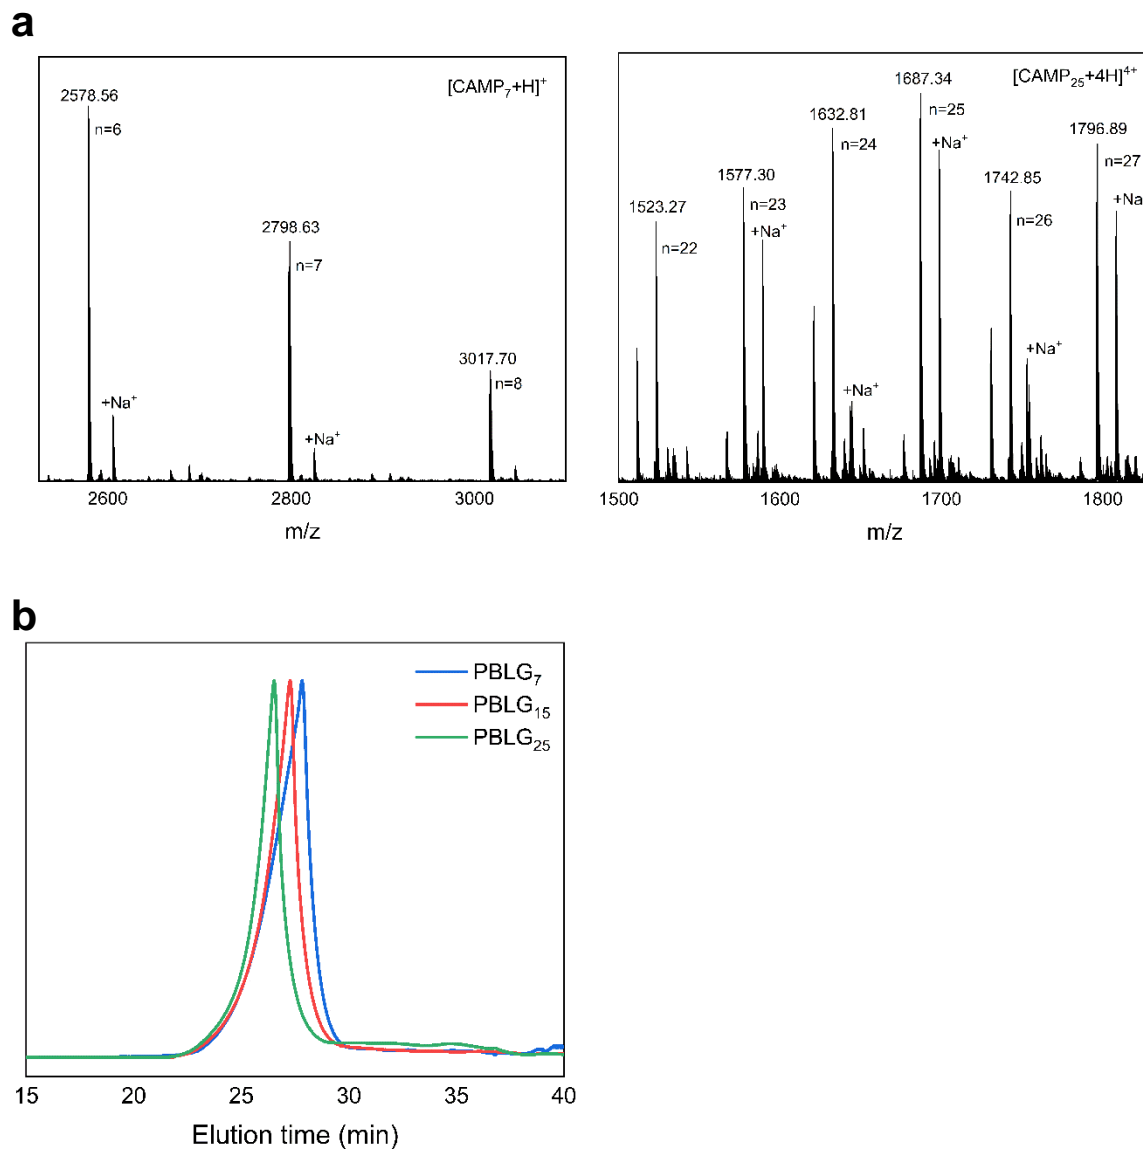

**Fig. S3** a) Q-TOF-MS analysis of  $\text{CAMP}_7$  and  $\text{CAMP}_{25}$ . b) GPC analysis of  $\text{PBLG}_7$ ,  $\text{PBLG}_{15}$  and  $\text{PBLG}_{25}$ .

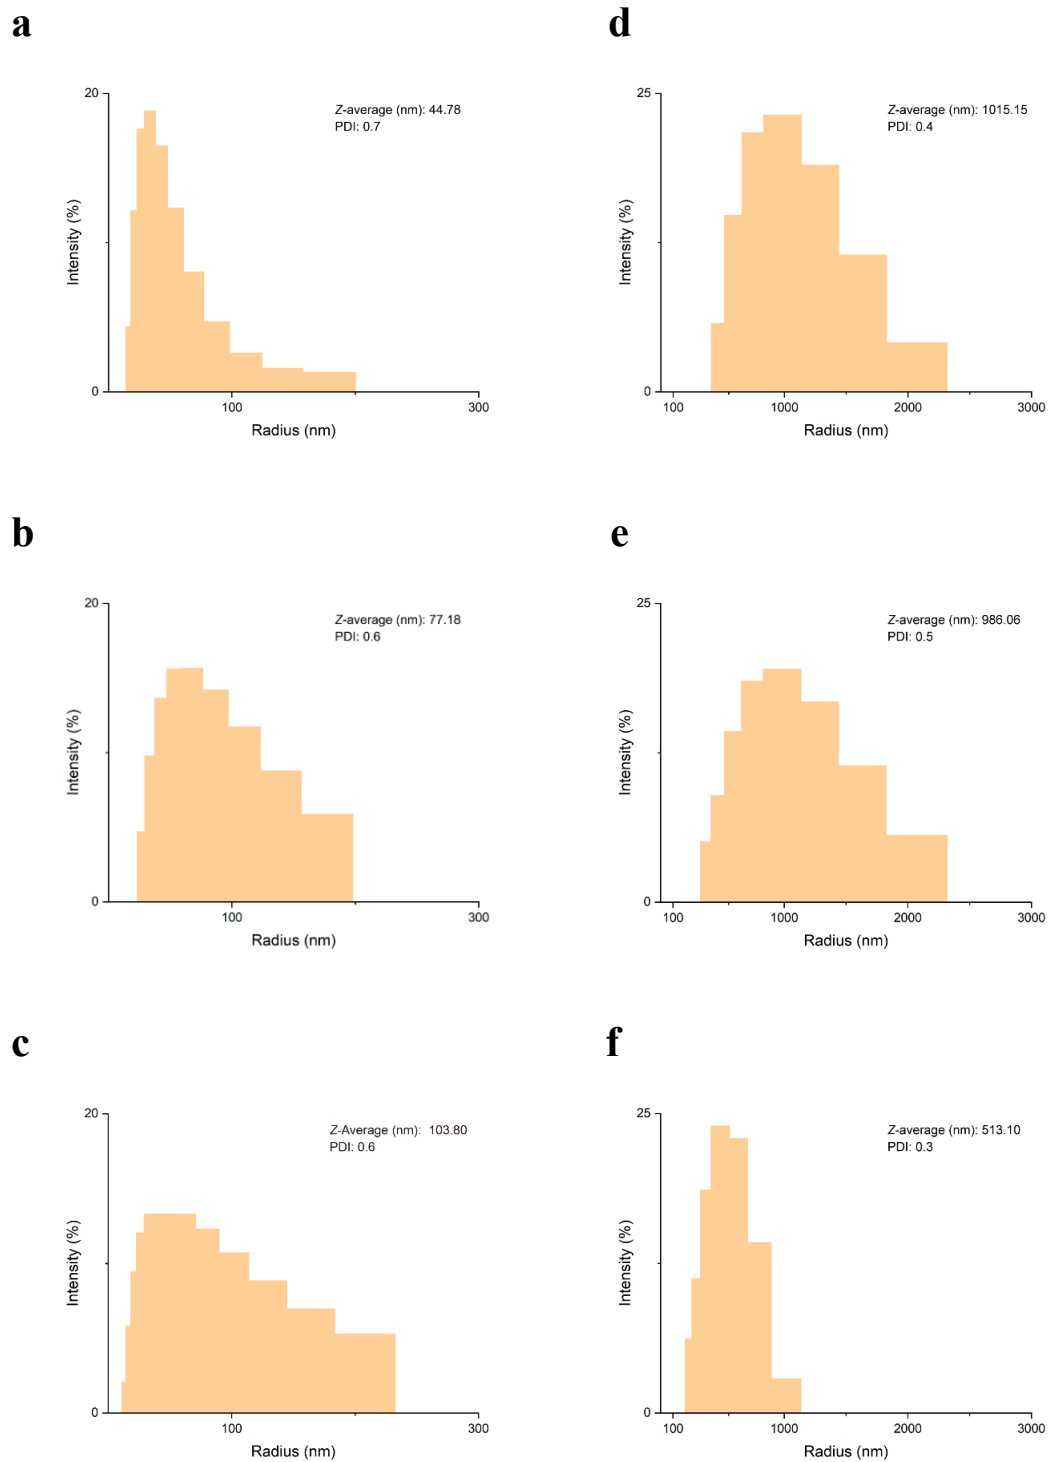

**Fig. S4** Size distribution of PBLG<sub>7</sub> (a), PBLG<sub>7</sub> + CAMP<sub>7</sub> (1/1, n/n) (b), CAMP<sub>7</sub> (c), PBLG<sub>25</sub> (d), PBLG<sub>25</sub> + CAMP<sub>25</sub> (1/1, n/n) (e) and CAMP<sub>25</sub> (f) assemblies characterized by DLS.

**a**

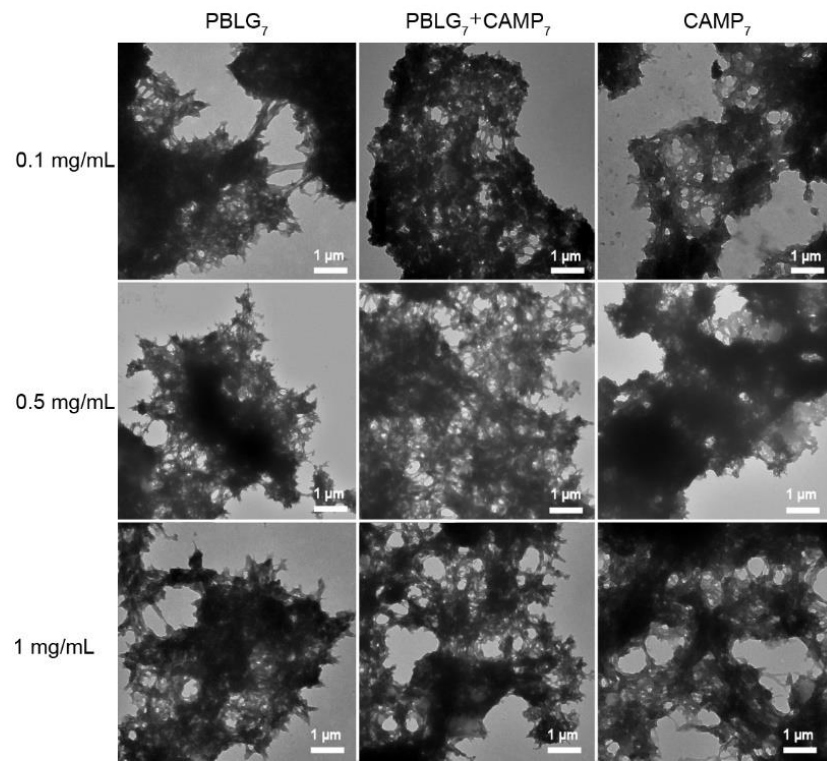

**b**

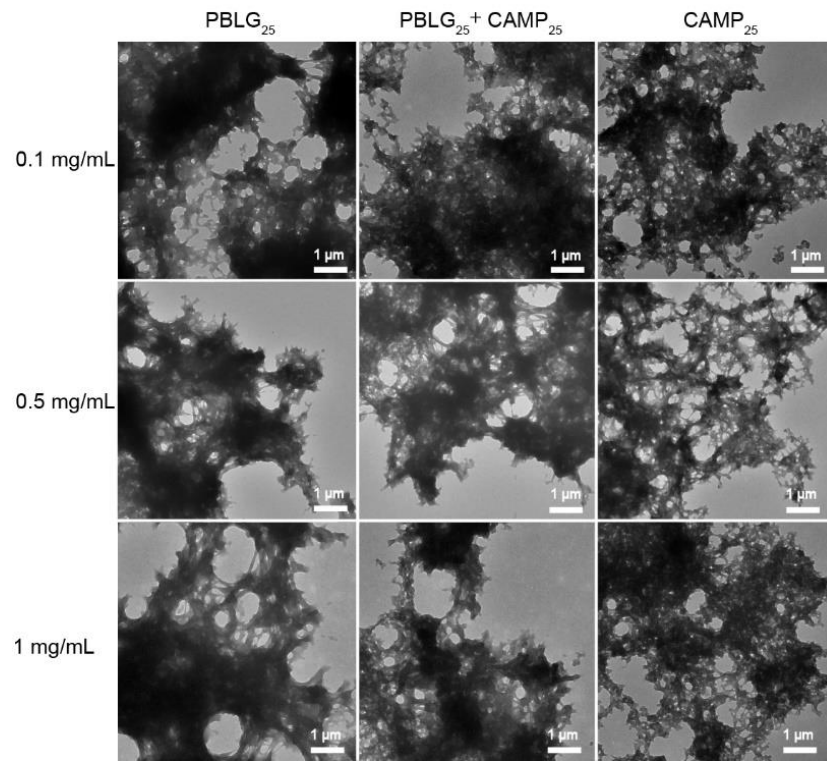

**c**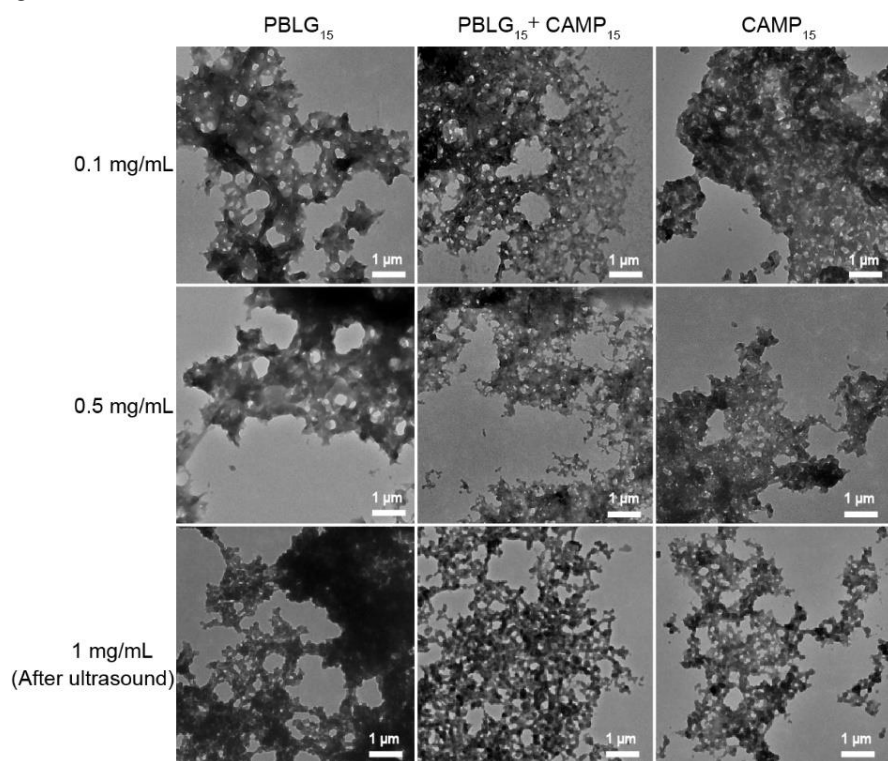

**Fig. S5** a) TEM images of PBLG<sub>7</sub>, PBLG<sub>7</sub> + CAMP<sub>7</sub> (1/1, n/n), CAMP<sub>7</sub> assemblies at different concentrations of 0.1 mg mL<sup>-1</sup>, 0.5 mg mL<sup>-1</sup> and 1 mg mL<sup>-1</sup> b) TEM images of PBLG<sub>25</sub>, PBLG<sub>25</sub> + CAMP<sub>25</sub> (1/1, n/n), CAMP<sub>25</sub> assemblies at different concentrations of 0.1 mg mL<sup>-1</sup>, 0.5 mg mL<sup>-1</sup> and 1 mg mL<sup>-1</sup>. c) TEM images of PBLG<sub>15</sub>, PBLG<sub>15</sub> + CAMP<sub>15</sub> (1/1, n/n), CAMP<sub>15</sub> assemblies at different concentrations of 0.1 mg mL<sup>-1</sup>, 0.5 mg mL<sup>-1</sup> and 1 mg mL<sup>-1</sup> after 20 minutes of ultrasound. Scale bar: 1 μm.

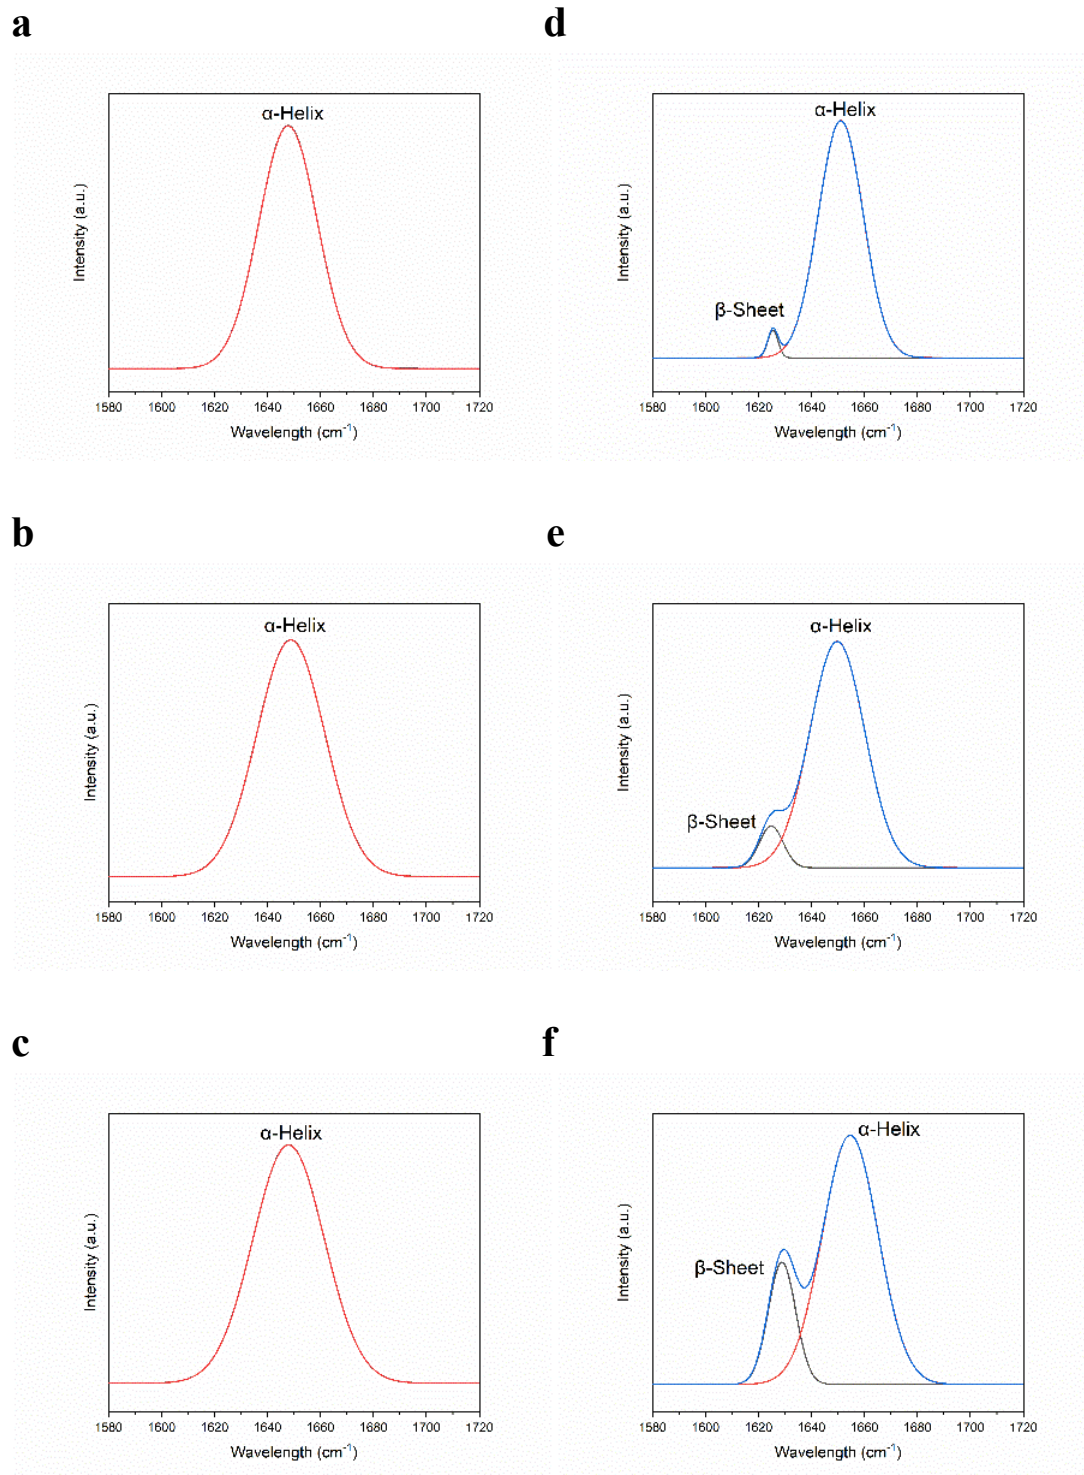

**Fig. S6** FTIR spectroscopy and deconvolution of PBLG<sub>7</sub> (a), PBLG<sub>7</sub> + CAMP<sub>7</sub> (1/1, n/n) (b), CAMP<sub>7</sub> (c), PBLG<sub>25</sub> (d), PBLG<sub>25</sub> + CAMP<sub>25</sub> (1/1, n/n) (e) and CAMP<sub>25</sub> (f) assemblies at amide I spectral region.

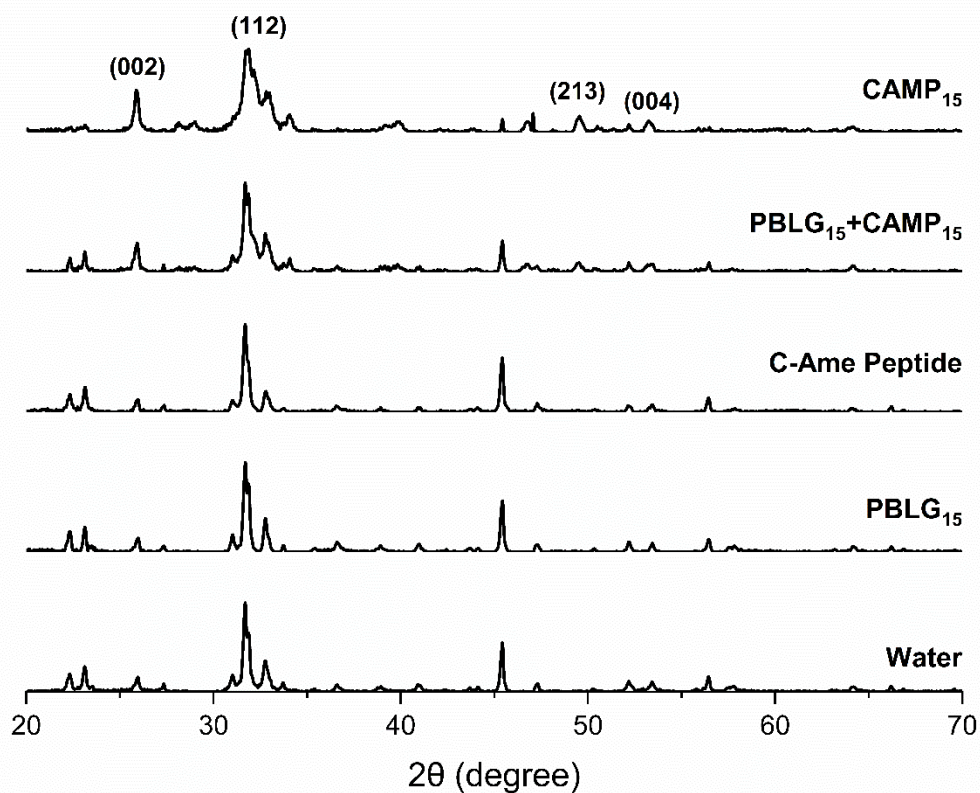

**Fig. S7** XRD spectra of the mineralized products of Water, PBLG<sub>15</sub>, C-Ame Peptide, PBLG<sub>15</sub> + CAMP<sub>15</sub> (1/1, n/n) and CAMP<sub>15</sub>. NaCl was removed from the mineralization solution and the mineralized products were immediately frozen with liquid nitrogen and lyophilized for getting the powder sample to be tested.

**a**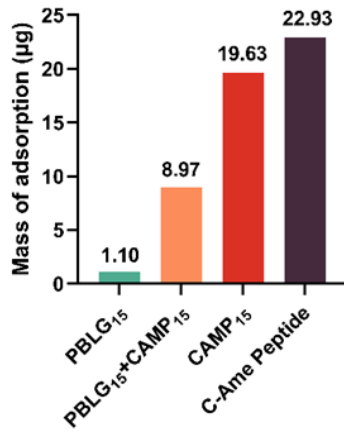**b**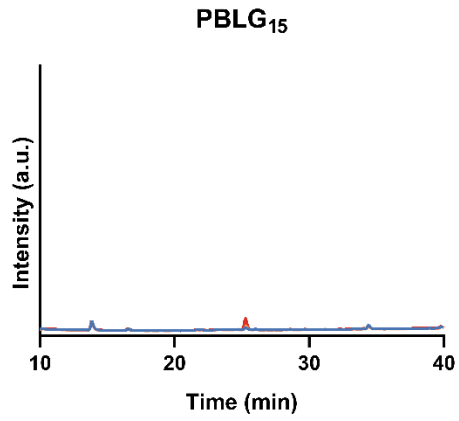**c**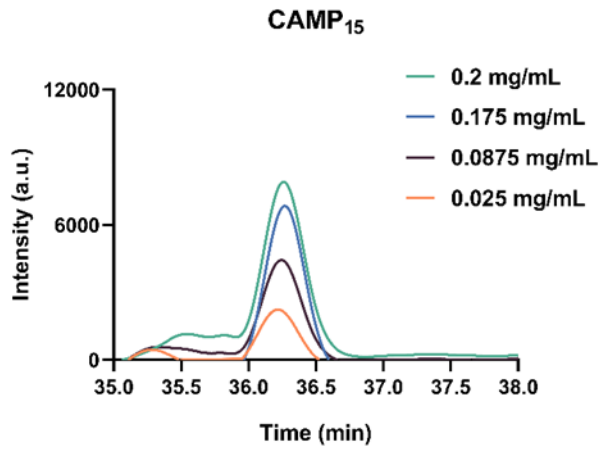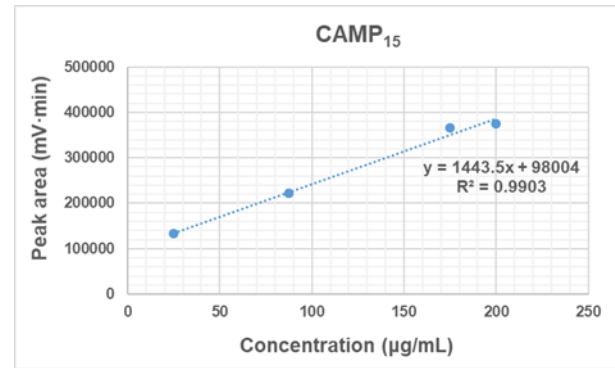**d**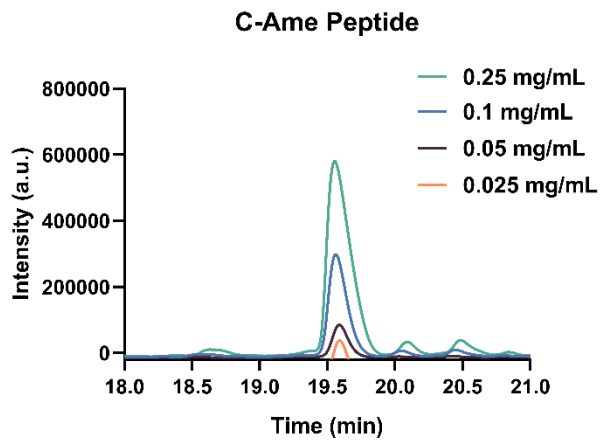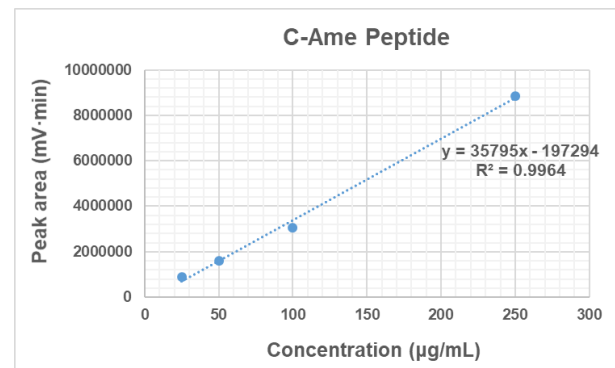

**e**

|                                 |                                                                                   |                                                                                    |                                                                                     |
|---------------------------------|-----------------------------------------------------------------------------------|------------------------------------------------------------------------------------|-------------------------------------------------------------------------------------|
|                                 | 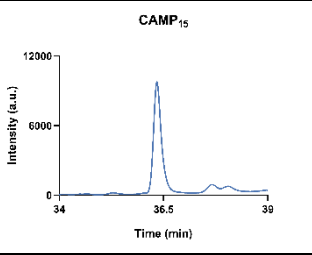 |  |  |
| Peak area (mV·min)              | 129577                                                                            | 138558                                                                             | 146056                                                                              |
| Concentration (µg/mL)           | 21.87                                                                             | 28.09                                                                              | 33.29                                                                               |
| Mass of adsorption (µg)         | 10.94                                                                             | 14.05                                                                              | 16.64                                                                               |
| Average mass of adsorption (µg) | $13.88 \pm 2.84$                                                                  |                                                                                    |                                                                                     |

**f**

|                                 |                                                                                    |                                                                                     |                                                                                      |
|---------------------------------|------------------------------------------------------------------------------------|-------------------------------------------------------------------------------------|--------------------------------------------------------------------------------------|
|                                 | 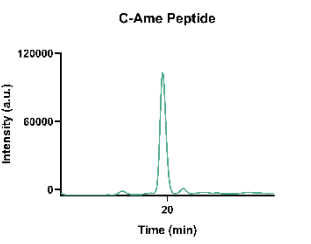 |  |  |
| Peak area (mV·min)              | 859125                                                                             | 973297                                                                              | 1056289                                                                              |
| Concentration (µg/mL)           | 29.51                                                                              | 32.70                                                                               | 35.02                                                                                |
| Mass of adsorption (µg)         | 14.76                                                                              | 16.35                                                                               | 17.51                                                                                |
| Average mass of adsorption (µg) | $16.21 \pm 1.38$                                                                   |                                                                                     |                                                                                      |

**Fig. S8** Characterization of long-term adsorption capacity of polypeptides on enamel in artificial saliva. a) Average mass of PBLG<sub>15</sub>, PBLG<sub>15</sub> + CAMP<sub>15</sub> (1/1, n/n), CAMP<sub>15</sub> and C-Ame Peptide coated on enamel slices using the BCA Protein Assay Kit. These data are the means (n=3). b) HPLC analysis of PBLG<sub>15</sub> after adding 500 µL 37% phosphoric acid and ultrasonic treatment. The analysis was conducted for three parallel determinations. Retention time of PBLG<sub>15</sub> is about 30.49 min in a linear gradient of 50-90% B for 40 min. c-d) Peak area-concentration standard curve of CAMP<sub>15</sub> (c) and C-Ame Peptide (d). e-f) HPLC analysis and average mass calculation of CAMP<sub>15</sub> (e) and C-Ame Peptide (f) after adding 500 µL 37% phosphoric acid and ultrasonic treatment. The



analysis was conducted for three parallel determinations. Retention time of CAMP<sub>15</sub> is about 36.41 min in a linear gradient of 30-80% B for 50 min. Retention time of C-Ame Peptide is about 19.96 min in a linear gradient of 5-45% B for 45 min. (HPLC solvent A: water, 0.06% TFA; B: 80% CH<sub>3</sub>CN/water, 0.06% TFA)

**a**

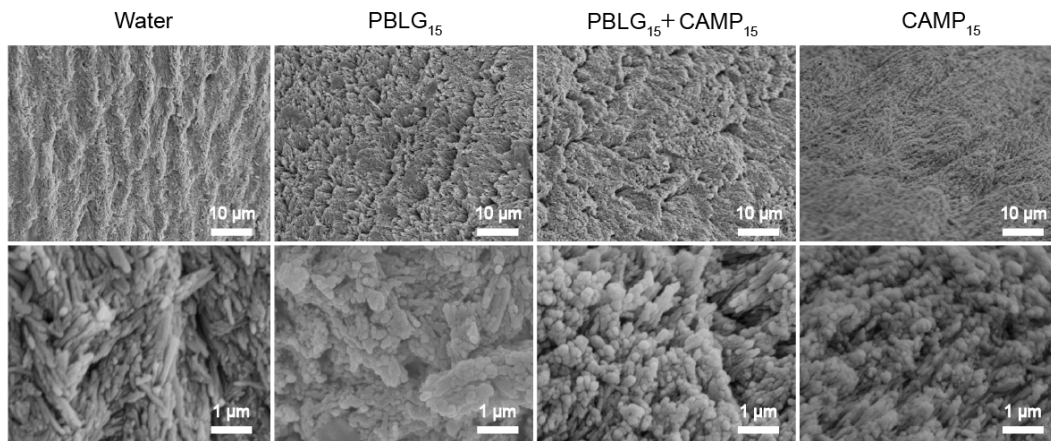

**b**

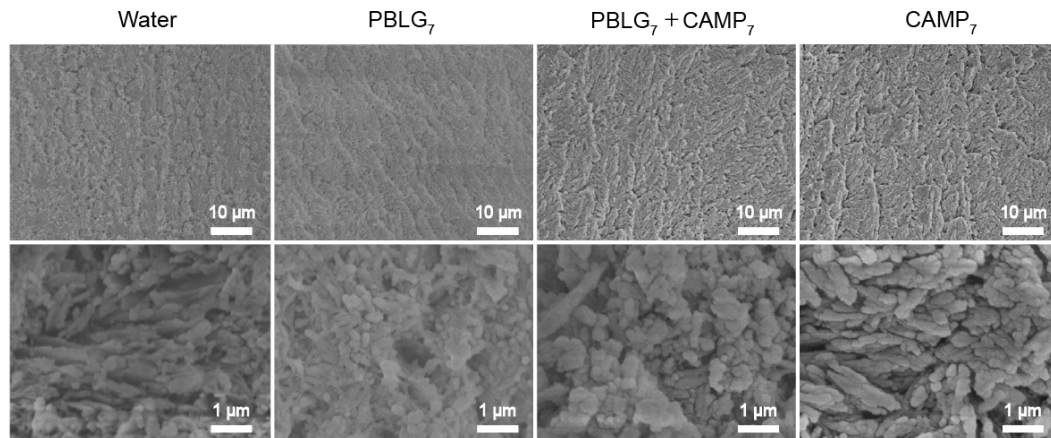

**c**

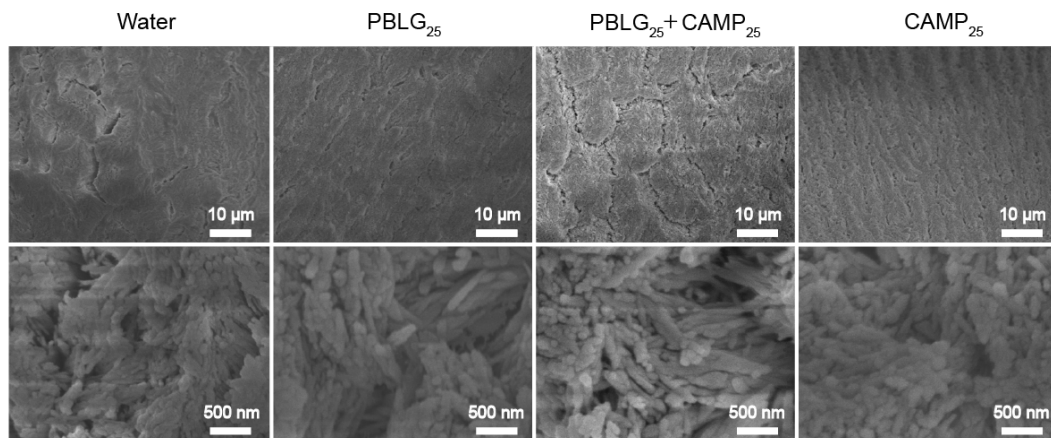

**d**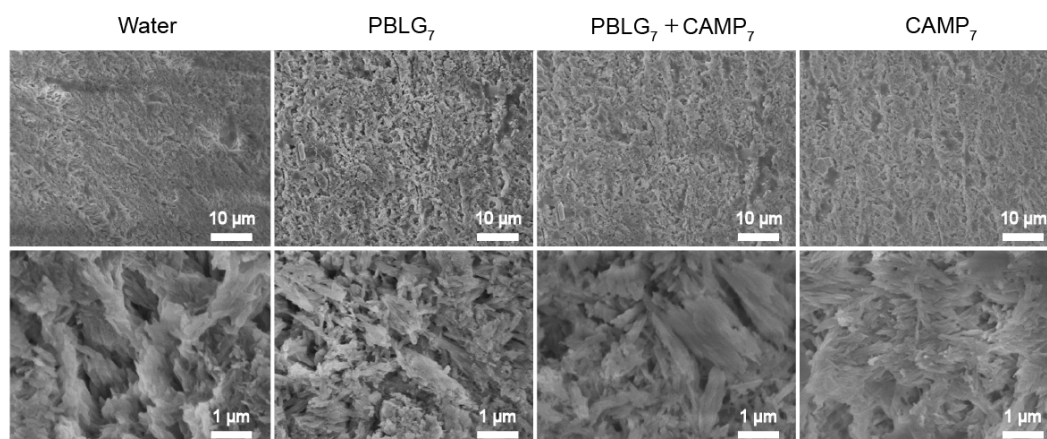**e**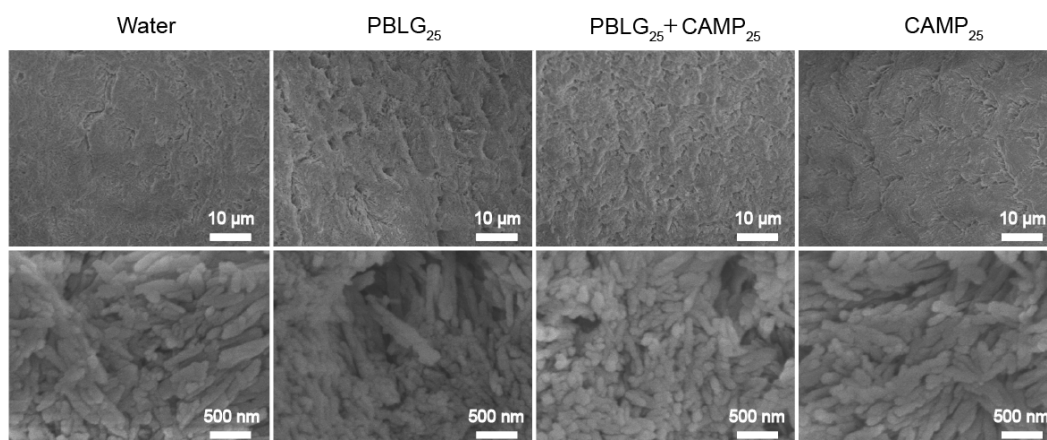

**Fig. S9** a) SEM low-magnification images and high-magnification images of Water-coated enamel, PBLG<sub>15</sub>-coated enamel, PBLG<sub>15</sub> + CAMP<sub>15</sub> (1/1, n/n)-coated enamel, and CAMP<sub>15</sub>-coated enamel after 3 days of incubation in artificial saliva. b) SEM low-magnification images and high-magnification images of Water-coated enamel, PBLG<sub>7</sub>-coated enamel, PBLG<sub>7</sub> + CAMP<sub>7</sub> (1/1, n/n)-coated enamel, and CAMP<sub>7</sub>-coated enamel after 3 days of incubation in artificial saliva. c) SEM low-magnification images and high-magnification images of Water-coated enamel, PBLG<sub>25</sub>-coated enamel, PBLG<sub>25</sub> + CAMP<sub>25</sub> (1/1, n/n)-coated enamel, and CAMP<sub>25</sub>-coated enamel after 3 days of incubation in artificial saliva. d) SEM low-magnification images and high-magnification images of Water-coated enamel, PBLG<sub>7</sub>-coated enamel, PBLG<sub>7</sub> + CAMP<sub>7</sub> (1/1, n/n)-coated enamel, and CAMP<sub>7</sub>-coated enamel after 6 days of incubation in artificial saliva. e) SEM low-magnification images and high-magnification images of Water-coated enamel, PBLG<sub>25</sub>-coated enamel, PBLG<sub>25</sub> + CAMP<sub>25</sub> (1/1, n/n)-coated enamel, and CAMP<sub>25</sub>-coated enamel after 6 days of

incubation in artificial saliva. Scale bars: 10  $\mu\text{m}$  (a-e (top)), 1  $\mu\text{m}$  (a, b, d (bottom)), and 500 nm (c, e (bottom)).

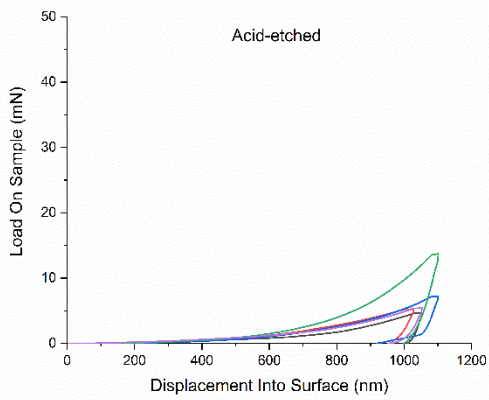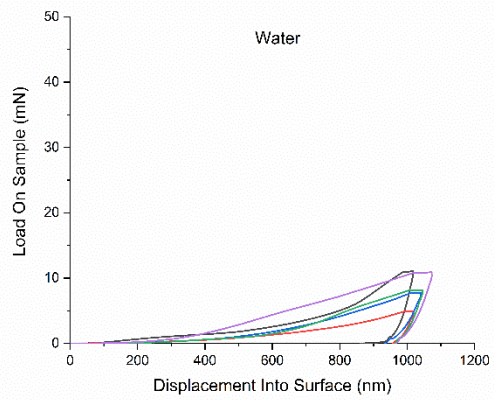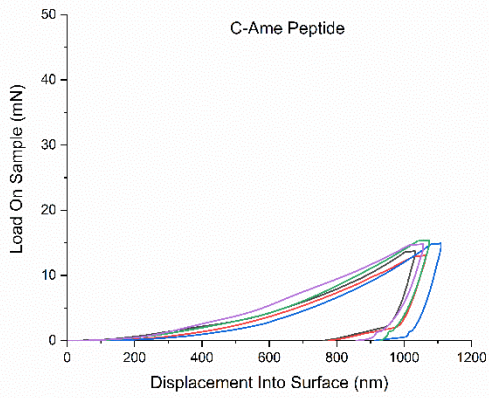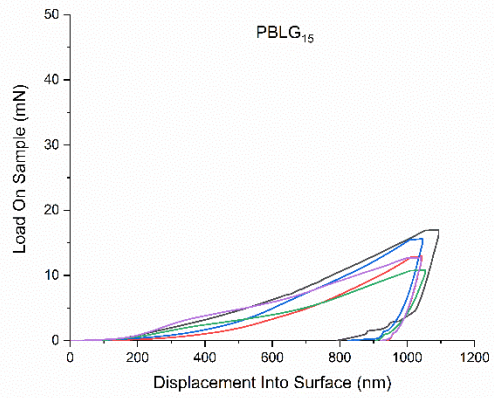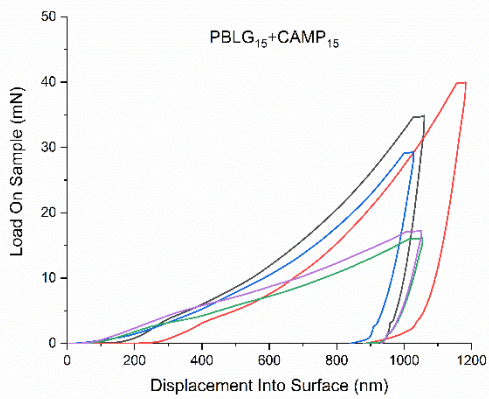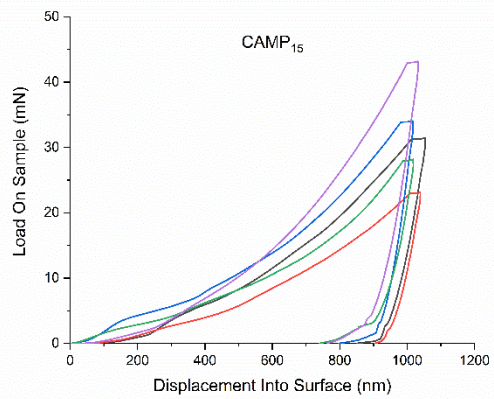

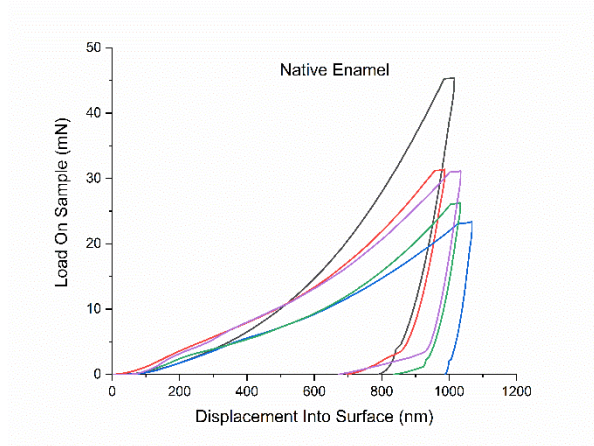

**Fig. S10** Load-displacement curves in nano-indentation tests including Acid-etched enamel, Water-coated enamel, C-Ame Peptide-coated enamel, PBLG<sub>15</sub>-coated enamel, PBLG<sub>15</sub> + CAMP<sub>15</sub> (1/1, n/n)-coated enamel, CAMP<sub>15</sub>-coated enamel and Native enamel.

**a**

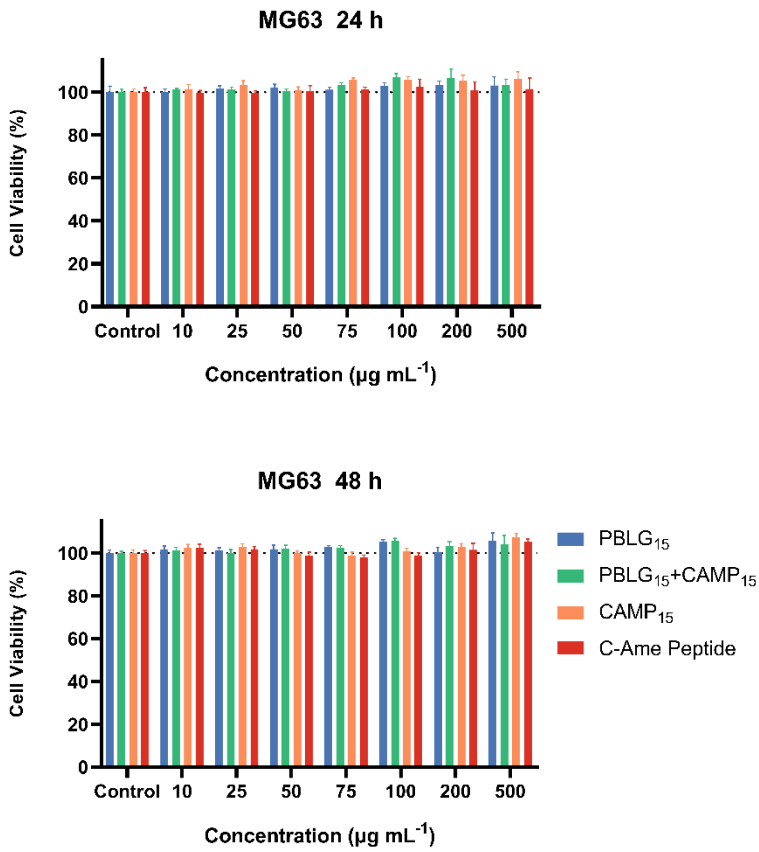

**b**

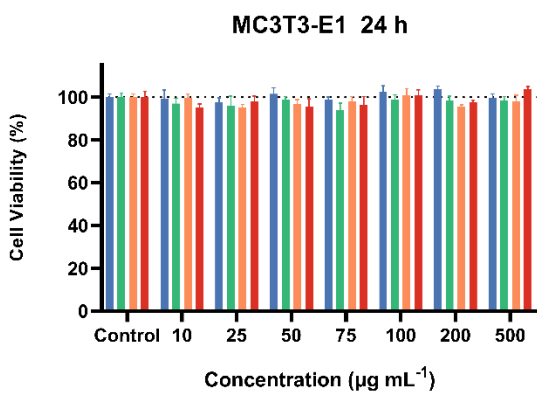

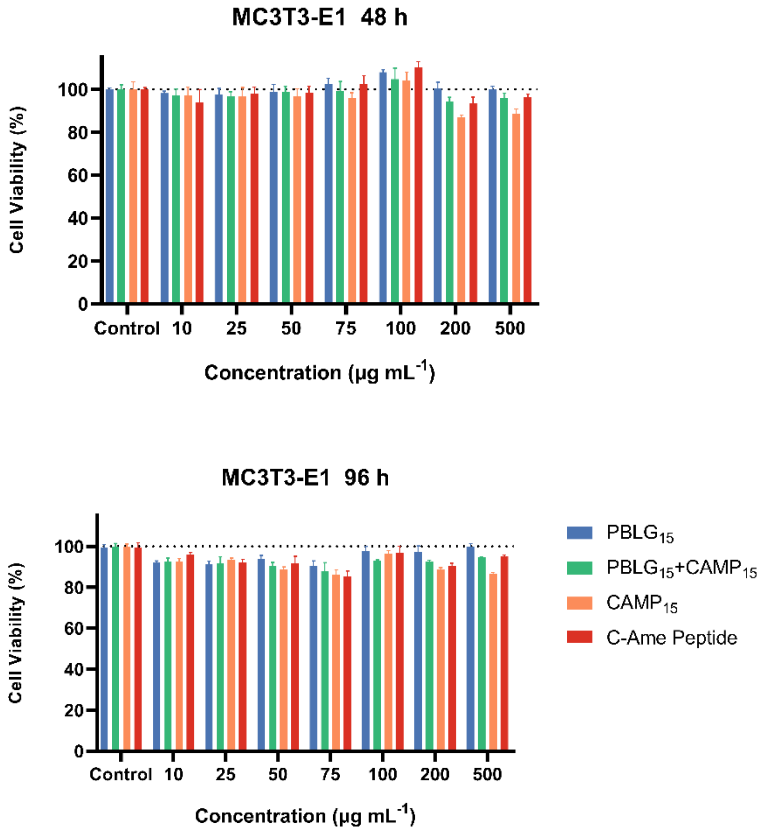

**Fig. S11** Cell viability of MG63 cell for 24 h and 48 h (a), MC3T3-E1 cell for 24 h, 48 h and 96 h (b) at different concentrations (0, 10, 25, 50, 75, 100, 200, 500  $\mu\text{g mL}^{-1}$ ) of PBLG<sub>15</sub>, PBLG<sub>15</sub> + CAMP<sub>15</sub> (1/1, n/n), CAMP<sub>15</sub> and C-Ame Peptide. These data are the means  $\pm$  SD (n=5).



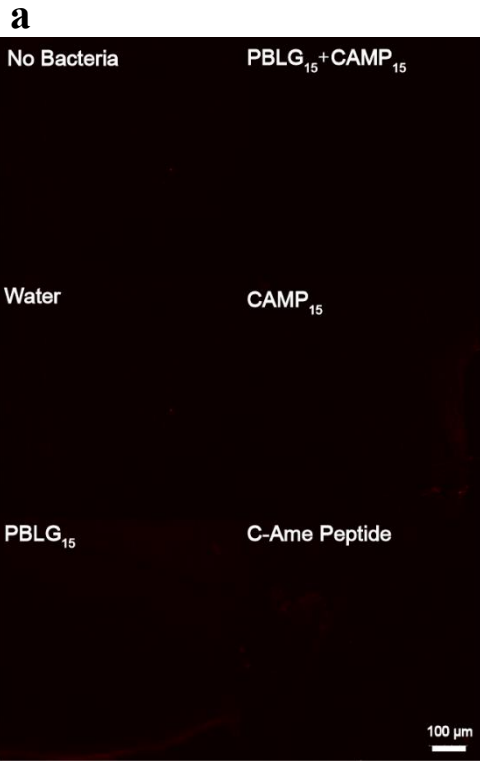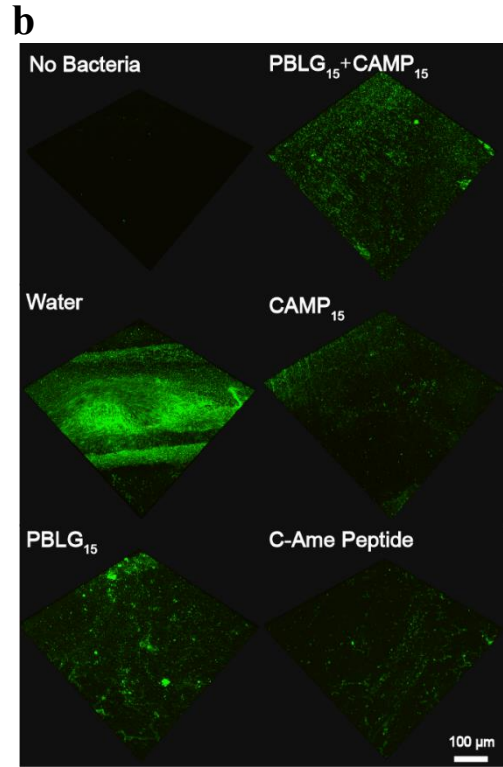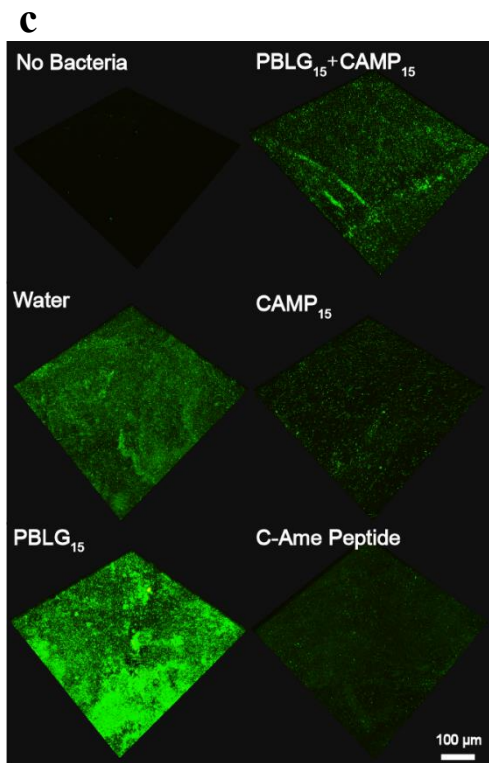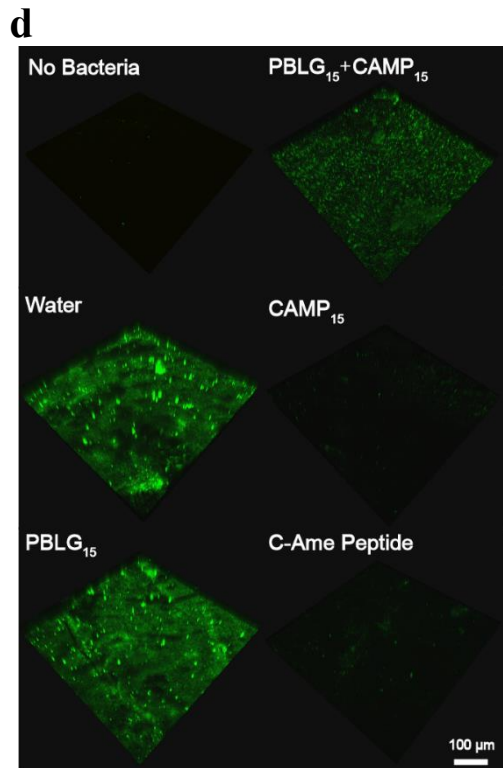

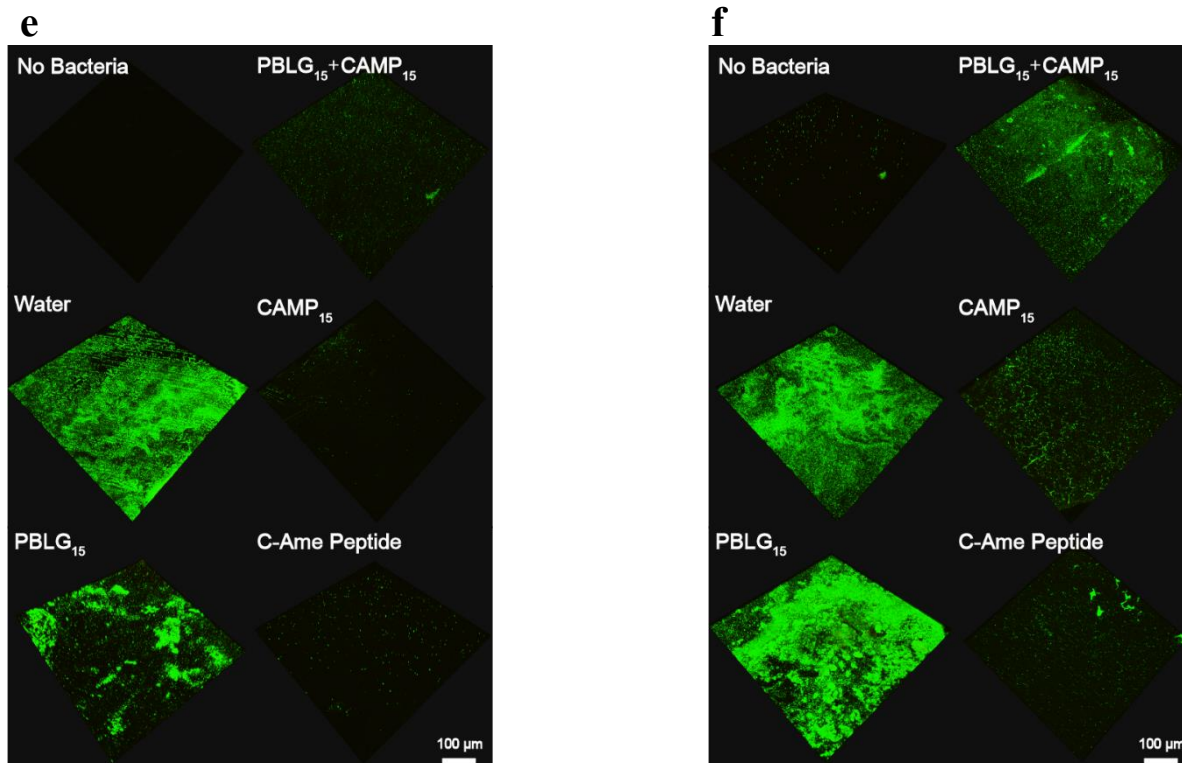

**Fig. S12** CLSM images of dead *Streptococcus mutans* biofilm distribution after 24 hours (a), CLSM 3D images of *Streptococcus mutans* biofilm distribution after 48 hours (b) and 72 hours (c) on the different enamels coated with No Bacteria, Water, PBLG<sub>15</sub>, PBLG<sub>15</sub> + CAMP<sub>15</sub> (1/1, n/n), CAMP<sub>15</sub> and C-Ame Peptide. CLSM 3D images of *Staphylococcus aureus* biofilm distribution after 24 hours (d), 48 hours (e) and 72 hours (f) on the different enamels coated with No Bacteria, Water, PBLG<sub>15</sub>, PBLG<sub>15</sub> + CAMP<sub>15</sub> (1/1, n/n), CAMP<sub>15</sub> and C-Ame Peptide. Scale bar: 100 μm.
